# Supplementary material for: Modeling the Public Transport Networks: A Study of Their Efficiency
Source: Hindawi journal article supplement (doi:10.1155/2021/3280777), 2021-01-01
Supplement: f1 [file 3280777.f1.docx]

**Supplementary Materials**

## S.1 Similarity Measures

### S.1.1 Local methods

Next, similarity measures used in this research are established.

**Adamic-Adar index** [44] between two nodes i, *j*, which can be defined as:

*Γ*(*i*) , *Γ*(*j*), represent the set of neighbours *i*, *j*. Γ(w) is the common neighbour of *i* and *j*.

**Salton Index** [45] between two nodes i, j, which can be defined as:

where , are the degrees of the nodes *i*, *j*, respectively.

**Cosine similarity on L+ Index** [46]

The symmetric Laplacian matrix *L* of *G* can be defined as:

D is a diagonal matrix, where

. *N* is the total of nodes in *G*

L+ is The Moore-Penrose pseudoinverse matrix of *L*, whose elements are:

The cosine similarity on *L+* Index between two nodes *i*, *j* in *G*, can be defined as:

**Hub Promoted Index** [47] between two nodes i, j, which can be defined as:

Where *Γ*(*i*) , *Γ*(*j*), are the set of neighbors of *i*, *j*.

, are the degrees of the nodes *i*, *j*; is the minimum of and .

**Jaccard Coefficient** [72] between two nodes *i*, *j*, which can be defined as:

where Γ(*i*) and Γ(*j*) represent the set of neighbors of *i* and *j*.

**Hub Depressed Index** [49, 50] between two nodes *i*, *j,* which can be defined as:

Where

*Γ*(*i*) , *Γ*(*j*), represent the set of neighbors of *i*, *j*; , are the degrees of *i* and *j*; is the maximum of and

**Leicht-Holme-Newman Index** [51] between two nodes *i*, *j*, which can be defined as:

Where

*Γ*(*i*) , *Γ*(*j*), denotes the set of neighbors of *i*, *j*. , are the degrees of *i* and *j* respectively.

**Preferential Attachment Index** [52] between two nodes *i*, *j*, which can be defined as:

Where:

, are the degrees of *i* and *j*.

**S**ø**rensen Index** [53] between two nodes *i*, *j*, which can be defined as:

*Γ*(*i*) , *Γ*(*j*), represent the set of neighbors of *i*, *j*; , are the degrees of *i* and *j*.

### S.1.2 Global methods

**Average Commute Time Index** [54] between two nodes i, j, which can be defined as:

where i and j are nodes, , are the associated entries in Laplacian Matrix, L +.

**Katz Index Index** [55]between two nodes *i*, *j*, which can be defined as:

A sum of the products of all path lengths in *G*, and β is a free parameter utilised to manage the path weight. Therefore, it can be calculated as:

is the set of all paths with length *l* linking *i* and *j*. β is the free parameter. The sum converges at the time when β is lower than the reciprocal of the largest eigenvalue of the adjacency matrix, *A*, of *G*.

**L+ directly Index** [46], between two nodes i,j is the element lij+ of *L+.*

**Matrix Forest Index** [46]

This index is determined by a similarity matrix which can be built as:

Where: *I* is the identity matrix, *L* is the Laplacian matrix of *G*. *L* which can be defined as: *L* = *D – A*, resulting in *D* and A becoming the degree and the adjacency matrixes of *G*, respectively.

The elements of this matrix are named “relative forest accessibilities” between two nodes .

**Random Walk with Restart** [57] between two nodes *i*, *j*, which can be defined as:

represents the probability with which a random walker beginning at node *i will* return to node *i* itself visiting a random neighbor.

### S.1.3 Quasi-local methods

**Graph distance** between two nodes *i*, *j*, which can be defined as:

*= min* is the length of the shortest path connecting *i* and *j.*

**Local Path Index** [58, 59]

A LPI matrix is established as:

LPI =

Where: , *A* is the adjacency matrix, α is a free parameter.

The Local Path Index between two nodes *i*, *j*, is determined by the element *ij* of LPI.

## S.2 Study of the Trip Times. Supplementary Tables

Table S.1: Results of comparisons of cumulative distributions, using the Kolmogorov-Smirnov test ( 95% confidence level).

| **AVL, CFL, RGTR, TICE** | | | |  | | | | |  | | | |  | | | |  | | | | |  |
| --- | --- | --- | --- | --- | --- | --- | --- | --- | --- | --- | --- | --- | --- | --- | --- | --- | --- | --- | --- | --- | --- | --- |
| Island Transit | p-value < 2.2e-16 | | | | | Lanta | | | | | p-value < 2.2e-16 | | | | Linja-Karjala Oy | | | | p-value < 2.2e-16 | | | |
| Metlink | p-value < 2.2e-16 | | | | | PPTC, ROPI | | | | | p-value < 2.2e-16 | | | | Sage | | | | p-value= 3.80515e-05 | | | |
| STAR | p-value < 2.2e-16 | | | | | Thunder Bay Transit | | | | | p-value < 2.2e-16 | | | | TransAntofagasta | | | | p-value < 2.2e-16 | | | |
| **Island Transit** | | | |  | | | | |  | | | |  | | | |  | | | | |  |
| AVL, CFL, RGTR, TICE | p-value < 2.2e-16 | | | | | Lanta | | | | | | p-value < 2.2e-16 | | | | Linja-Karjala Oy | | | | p-value = 9.95e-12 | | |
| Metlink | p-value = 6.665e-11 | | | | | PPTC, ROPI | | | | | | p-value < 2.2e-16 | | | | IT | | | | p-value= 0.14881 | | |
| STAR | p-value < 2.2e-16 | | | | | Thunder Bay Transit | | | | | | p-value < 2.2e-16 | | | | TransAntofagasta | | | | p-value < 2.2e-16 | | |
| **Lanta** | | |  | | |  | | | | | | |  | | | |  | | | | |  |
| AVL, CFL, RGTR, TICE | p-value < 2.2e-16 | | | | | Island Transit | | | | | | p-value < 2.2e-16 | | | | Linja-Karjala Oy Lanta | | p-value < 2.2e-16 | | | | |
| Metlink | p-value < 2.2e-16 | | | | | PPTC, ROPI | | | | | | p-value < 2.2e-16 | | | | Sage | | p-value=3.20916e-05 | | | | |
| STAR | p-value < 2.2e-16 | | | | | Thunder Bay Transit | | | | | | p-value < 2.2e-16 | | | | TransAntofagasta | | p-value < 2.2e-16 | | | | |
| **Linja-Karjala Oy Lanta** | | | |  | | | | |  | | | |  | | | |  | | | |  | |
| AVL, CFL, RGTR, TICE | p-value < 2.2e-16 | | | | Island Transit | | | | | p-value = 9.95e-12 | | | | Lanta | | | | p-value < 2.2e-16 | | | | |
| Metlink | p-value < 2.2e-16 | | | | PPTC, ROPI | | | | | p-value < 2.2e-16 | | | | Sage | | | | p-value = 4.77135e-05 | | | | |
| STAR | p-value < 2.2e-16 | | | | Thunder Bay Transit | | | | | p-value < 2.2e-16 | | | | TransAntofagasta | | | | p-value < 2.2e-16 | | | | |
| **Metlink** | | | |  | | | | |  | | | |  | | | |  | | | | |  |
| AVL, CFL, RGTR, TICE | | p-value < 2.2e-16 | | | | | | | Island Transit | | | p-value = 6.665e-11 | | | Lanta | | | | p-value < 2.2e-16 | | | |
| Linja-Karjala Oy | | p-value < 2.2e-16 | | | | | | | PPTC, ROPI | | | p-value < 2.2e-16 | | | Sage | | | | p-value= 0.00022 | | | |
| STAR | | p-value < 2.2e-16 | | | | | | | Thunder Bay Transit | | | p-value < 2.2e-16 | | | TransAntofagasta | | | | p-value < 2.2e-16 | | | |
| **PPTC, ROPIT** | | | |  | | | | |  | | | |  | | | |  | | | | |  |
| AVL, CFL, RGTR, TICE | | p-value < 2.2e-16 | | | | Island Transit | | | | | | p-value < 2.2e-16 | | | | Lanta | | | | p-value < 2.2e-16 | | |
| Linja-Karjala Oy | | p-value < 2.2e-16 | | | | Metlink | | | | | | p-value < 2.2e-16 | | | | Sage | | | | 5.60146e-05 | | |
| STAR | | p-value < 2.2e-16 | | | | Thunder Bay Transit | | | | | | p-value < 2.2e-16 | | | | TransAntofagasta | | | | p-value < 2.2e-16 | | |
| **STAR** | | | |  | | | | |  | | | |  | | | |  | | | | |  |
| AVL, CFL, RGTR, TICE | | p-value < 2.2e-16 | | | | Island Transit | | | | | | p-value < 2.2e-16 | | | | Lanta | | | | p-value < 2.2e-16 | | |
| Linja-Karjala Oy | | p-value < 2.2e-16 | | | | Metlink | | | | | | p-value < 2.2e-16 | | | | PPTC, ROPI | | | | p-value < 2.2e-16 | | |
| Sage | | p-value=0.03644 | | | | Thunder Bay Transit | | | | | | p-value < 2.2e-16 | | | | TransAntofagasta | | | | p-value < 2.2e-16 | | |
| **Thunder Bay Transit** | | |  | | | | | |  | | | |  | | | |  | | | | |  |
| AVL, CFL, RGTR, TICE | p-value < 2.2e-16 | | | | | | Island Transit | | | | | p-value < 2.2e-16 | | | | Lanta | | | | p-value < 2.2e-16 | | |
| Linja-Karjala Oy | p-value < 2.2e-16 | | | | | | Metlink | | | | | p-value < 2.2e-16 | | | | PPTC, ROPI | | | | p-value < 2.2e-16 | | |
| Sage | p-value=6.08076e-05 | | | | | | STAR | | | | | p-value < 2.2e-16 | | | | TransAntofagasta | | | | p-value < 2.2e-16 | | |
| **TransAntofagasta** | | | | | | | | | | | | | | | | | | | | | |  |
| AVL, CFL, RGTR, TICE | | p-value < 2.2e-1 | | | | | | Island Transit | | | | | p-value < 2.2e-16 | | | | Lanta | | | p-value < 2.2e-16 | | |
| Linja-Karjala Oy | | p-value < 2.2e-16 | | | | | | PPTC, ROPI | | | | | p-value < 2.2e-16 | | | | Metlink | | | p-value < 2.2e-16 | | |
| Sage | | p-value=0.20735 | | | | | | STAR | | | | | p-value < 2.2e-16 | | | | Thunder Bay Transit | | | p-value < 2.2e-16 | | |

## S.3. Study of the Local Efficiency. Supplementary Tables

Table S.2: Results of comparation of cumulative distributions of the Local Efficiency, using the Kolmogorov-Smirnov test ( 95% confidence level).

| **AVL, CFL, RGTR, TICE** | | |  | | |  | |  | |  |  | | |
| --- | --- | --- | --- | --- | --- | --- | --- | --- | --- | --- | --- | --- | --- |
| Island Transit | p-value = 0.00960 | | | | Lanta | | | p-value = 0.4351 | | Linja-Karjala Oy | p-value = 0.51760 | | |
| Metlink | p-value = 0.01192 | | | | PPTC, ROPI | | | p-value = 0.04854 | | Sage | p-value = 0.07134 | | |
| **STAR** | | |  | | |  | |  | |  | | |  |
| Island Transit | p-value = 0.05580 | | | | Thunder Bay Transit | | | p-value = 0.64330 | | TransAntofagasta | p-value = 0.57630 | | |
| AVL, CFL, RGTR, TICE | p-value = 0.00960 | | | | Lanta | | | p-value = 0.6035 | | Linja-Karjala Oy | p-value = 0.47080 | | |
| Metlink | p-value = 0.32790 | | | | PPTC, ROPI | | | p-value = 0.29430 | | Sage | p-value = 0.97630 | | |
| STAR | p-value = 0.16410 | | | | Thunder Bay Transit | | | p-value = 0.35980 | | TransAntofagasta | p-value = 0.18880 | | |
| **Lanta** | | |  | | |  | |  | |  | | |  |
| AVL, CFL, RGTR, TICE | p-value = 0.43510 | | | | Island Transit | | p-value = 0.60350 | | Linja-Karjala Oy Lanta | | p-value = 1 | | |
| Metlink | p-value = 0.32790 | | | | PPTC, ROPI | | p-value = 0.94640 | | Sage | | p-value = 0.58480 | | |
| STAR | p-value = 0.87250 | | | | Thunder Bay Transit | | p-value = 0.83270 | | TransAntofagasta | | p-value = 0.95460 | | |
| **Linja-Karjala Oy Lanta** | | |  | | |  | |  | |  | | |  |
| AVL, CFL, RGTR, TICE | p-value = 0.51760 | | | | Island Transit | | | p-value = 0.47080 | | Lanta | p-value = 1 | | |
| Metlink | p-value = 0.88 | | | | PPTC, ROPI | | | p-value = 0.97070 | | Sage | p-value = 0.6604 | | |
| STAR | p-value = 0.97440 | | | | Thunder Bay Transit | | | p-value = 0.95920 | | TransAntofagasta | p-value = 0.9992 | | |
| **Metlink** |  | | | |  | | |  | |  | | |  |
| AVL, CFL, RGTR, TICE | p-value = 0.01192 | | | | Island Transit | | | p-value = 0.3279 | | Lanta | p-value = 0.9663 | | |
| Linja-Karjala Oy | p-value = 0.88 | | | | PPTC, ROPI | | | p-value = 0.99560 | | Sage | p-value = 0.2105 | | |
| STAR | p-value = 0.54750 | | | | Thunder Bay Transit | | | p-value = 0.87260 | | TransAntofagasta | p-value = 0.45060 | | |
| **PPTC, ROPIT** | | |  | | |  | |  | |  | | |  |
| AVL, CFL, RGTR, TICE | | p-value = 0.04854 | | | Island Transit | | | p-value = 0.29430 | | Lanta | | p-value = 0.94640 | |
| Linja-Karjala Oy | | p-value = 0.97070 | | | Metlink | | | p-value = 0.99560 | | Sage | | p-value = 0.2296 | |
| STAR | | p-value = 0.95780 | | | Thunder Bay Transit | | | p-value = 0.92210 | | TransAntofagasta | | p-value = 0.66550 | |
| **STAR** | | |  | | |  | |  | |  | | |  |
| AVL, CFL, RGTR, TICE | p-value = 0.05580 | | | Island Transit | | | | p-value = 0.16410 | | Lanta | | p-value = 0.87250 | |
| Linja-Karjala Oy | p-value = 0.97440 | | | Metlink | | | | p-value = 0.5475 | | PPTC, ROPIT | | p-value = 0.95780 | |
| Sage | p-value = 0.1404 | | | Thunder Bay Transit | | | | p-value = 0.99420 | | TransAntofagasta | | p-value = 0.75210 | |
| **Thunder Bay Transit** | | |  | | |  | |  | |  | | |  |
| AVL, CFL, RGTR, TICE | p-value = 0.64330 | | | Island Transit | | | | p-value = 0.35980 | | Lanta | | p-value = 0.83270 | |
| Linja-Karjala Oy | p-value = 0.95920 | | | Metlink | | | | p-value = 0.87260 | | PPTC, ROPIT | | p-value = 0.92210 | |
| Sage | p-value = 0.4005 | | | STAR | | | | p-value = 0.99420 | | TransAntofagasta | | p-value = 0.99630 | |
| **TransAntofagasta** | | | | | | | | | | | |  | |
| AVL, CFL, RGTR, TICE | | p-value = 0.57630 | | | Island Transit | | | p-value = 0.18880 | | Lanta | | p-value = 0.95460 | |
| Linja-Karjala Oy | | p-value = 0.99920 | | | PPTC, ROPIT | | | p-value = 0.66550 | | Metlink | | p-value = 0.45060 | |
| Sage | | p-value = 0.3097 | | | STAR | | | p-value = 0.7521 | | Thunder Bay Transit | | p-value = 0.99630 | |

## S.4 Study of Correlations between Centrality Measures. Supplementary Tables

Table S.3: Spearman correlation for all analysed centrality measures in AVL, CFL, RGTR, TICE networks. EC: Eigenvector centrality, BC: Betweenness centrality, PR: Pagerank centrality, k: degree, AC: Authority centrality, HC: Hub centrality.

|  | EC | BC | PR | k | HC | AC | flow of vehicles |
| --- | --- | --- | --- | --- | --- | --- | --- |
| EC | 1 | 0,26334 | 0,03971 | 0,37427 | 1 | 1 | -0,04826 |
| BC | 0,26334 | 1 | 0,59012 | 0,58173 | 0,26334 | 0,26334 | 0,01068 |
| PR | 0,03971 | 0,59012 | 1 | 0,85548 | 0,03971 | 0,03971 | -0,01249 |
| k | 0,37427 | 0,58173 | 0,85548 | 1 | 0,37427 | 0,37427 | 0,00519 |
| HC | 1 | 0,26334 | 0,03971 | 0,37427 | 1 | 1 | -0,04825 |
| AC | 1 | 0,26334 | 0,03971 | 0,37427 | 1 | 1 | -0,04825 |
| flow of vehicles | -0,04826 | 0,01068 | -0,01249 | 0,00520 | -0,04825 | -0,04825 | 1 |

Table S.4: Spearman correlation for all analysed centrality measures in Island Transit. EC: Eigenvector centrality, BC: Betweenness centrality, PR: Pagerank centrality, k: degree, AC: Authority centrality, HC: Hub centrality.

|  | EC | BC | | PR | k | HC | | AC | flow of vehicles |
| --- | --- | --- | --- | --- | --- | --- | --- | --- | --- |
| EC | 1 | 0,14951 | | 0,02133 | 0,09168 | 0,85270 | | 0,85270 | -0,12049 |
| BC | 0,14952 | 1 | | 0,27676 | 0,18414 | 0,169963 | | 0,16996 | -0,18852 |
| PR | 0,02133 | 0,27676 | | 1 | 0,69798 | -0,05441 | | -0,05441 | -0,04031 |
| k | 0,09168 | 0,18414 | | 0,69798 | 1 | 0,17272 | | 0,17272 | 0,01559 |
| HC | 0,85270 | 0,16996 | | -0,05441 | 0,17272 | 1 | | 1 | -0,12682 |
| AC | 0,85270 | 0,16996 | | -0,05441 | 0,17272 | 1 | | 1 | -0,12682 |
| flow of vehicles | -0,12049 | -0,18852 | | -0,04031 | 0,01559 | -0,12682 | | -0,12682 | 1 |
|  |  | |  |  |  | |  |  |  |

Table S.5: Spearman correlation for all analysed centrality measures in Lanta network.EC: Eigenvector centrality, BC: Betweenness centrality, PR: Pagerank centrality, k: degree, AC: Authority centrality, HC: Hub centrality.

|  | EC | BC | PR | k | HC | AC | flow of vehicles | |
| --- | --- | --- | --- | --- | --- | --- | --- | --- |
| EC | 1 | 0,15488 | -0,18462 | 0,16607 | 0,86292 | 0,86292 | 0,111011 | |
| BC | 0,15488 | 1 | 0,00101 | 0,25850 | 0,08680 | 0,08680 | 0,05002 | |
| PR | -0,18462 | 0,00101 | 1 | 0,56077 | 0,02240 | 0,02240 | -0,05793 | |
| k | 0,16607 | 0,25850 | 0,56077 | 1 | 0,09980 | 0,09980 | 0,04354 | |
| HC | 0,86292 | 0,08680 | 0,02240 | 0,09980 | 1 | 1 | 0,04478 | |
| AC | 0,86292 | 0,08680 | 0,02240 | 0,09980 | 1 | 1 | 0,04478 | |
| flow of vehicles | 0,11101 | 0,05002 | -0,05793 | 0,04354 | 0,04478 | 0,04478 | 1 |

Table S.6: Spearman correlation for all analysed centrality measures in Linja-Karjala Oy network. EC: Eigenvector centrality, BC: Betweenness centrality, PR: Pagerank centrality, k: degree, AC: Authority centrality, HC: Hub centrality.

|  | EC | BC | PR | k | HC | AC | flow of vehicles |
| --- | --- | --- | --- | --- | --- | --- | --- |
| EC | 1 | 0,42305 | 0,03237 | 0,50777 | 0,99997 | 0,99997 | -0,01134 |
| BC | 0,42305 | 1 | 0,38151 | 0,51642 | 0,42319 | 0,42319 | -0,01968 |
| PR | 0,03237 | 0,38151 | 1 | 0,78771 | 0,03327 | 0,03327 | 0,02747 |
| k | 0,50777 | 0,51642 | 0,78771 | 1 | 0,50928 | 0,50928 | 0,06325 |
| HC | 0,99997 | 0,42319 | 0,03327 | 0,50928 | 1 | 1 | -0,01101 |
| AC | 0,99997 | 0,42319 | 0,03327 | 0,50928 | 1 | 1 | -0,01101 |
| flow of vehicles | -0,01134 | -0,01968 | 0,02747 | 0,06325 | -0,01101 | -0,01101 | 1 |

Table S.7: Spearman correlation for all analysed centrality measures in Metlink. EC: Eigenvector centrality, BC: Betweenness centrality, PR: Pagerank centrality, k: degree, AC: Authority centrality, HC: Hub centrality.

|  | EC | BC | PR | k | HC | AC | flow of vehicles |
| --- | --- | --- | --- | --- | --- | --- | --- |
| EC | 1 | 0,17201 | -0,17878 | 0,29510 | 0,99984 | 0,99984 | 0,05293 |
| BC | 0,17201 | 1 | 0,30098 | 0,39730 | 0,17400 | 0,17400 | -0,00664 |
| PR | -0,17878 | 0,30098 | 1 | 0,69856 | -0,17702 | -0,17702 | 0,00150 |
| k | 0,29510 | 0,39730 | 0,69856 | 1 | 0,29796 | 0,29796 | 0,05014 |
| HC | 0,99984 | 0,17400 | -0,17702 | 0,29796 | 1 | 1 | 0,05264 |
| AC | 0,99984 | 0,17400 | -0,17702 | 0,29796 | 1 | 1 | 0,05264 |
| flow of vehicles | 0,05293 | -0,00664 | 0,00150 | 0,05014 | 0,05264 | 0,05264 | 1 |

Table S.8: Spearman correlation for all analysed centrality measures in Prague Public Transit Company, Regional Organiser of Prague Integrated Transport. EC: Eigenvector centrality, BC: Betweenness centrality, PR: Pagerank centrality, k: degree, AC: Authority centrality, HC: Hub centrality.

|  | EC | BC | PR | k | HC | AC | flow of vehicles |
| --- | --- | --- | --- | --- | --- | --- | --- |
| EC | 1 | 0,20156 | 0,01161 | 0,17742 | 0,996940 | 0,99694 | -0,05776 |
| BC | 0,20156 | 1 | 0,48569 | 0,58600 | 0,21627 | 0,21627 | -0,11465 |
| PR | 0,01161 | 0,48569 | 1 | 0,85576 | 0,02587 | 0,02587 | -0,06118 |
| k | 0,17742 | 0,58600 | 0,85576 | 1 | 0,20112 | 0,20112 | -0,07979 |
| HC | 0,99694 | 0,21627 | 0,02587 | 0,20112 | 1 | 1 | -0,05707 |
| AC | 0,99694 | 0,21627 | 0,02587 | 0,20112 | 1 | 1 | -0,05707 |
| flow of vehicles | -0,05775 | -0,11465 | -0,06118 | -0,07979 | -0,05707 | -0,05707 | 1 |

Table S.9: Spearman correlation for all analysed centrality measures in Sage. EC: Eigenvector centrality, BC: Betweenness centrality, PR: Pagerank centrality, k: degree, AC: Authority centrality, HC: Hub centrality.

|  | EC | BC | PR | k | HC | AC | flow of vehicles |
| --- | --- | --- | --- | --- | --- | --- | --- |
| EC | 1 | 0,05834 | 0,10121 | 0,53922 | 0,99990 | 0,99990 | 0,36808 |
| BC | 0,05834 | 1 | 0,23458 | 0,20264 | 0,05835 | 0,05835 | 0,00206 |
| PR | 0,10121 | 0,23458 | 1 | 0,78461 | 0,10142 | 0,10142 | 0,23817 |
| k | 0,53922 | 0,20264 | 0,78461 | 1 | 0,539278 | 0,53928 | 0,38990 |
| HC | 0,99990 | 0,05835 | 0,10142 | 0,53928 | 1 | 1 | 0,37222 |
| AC | 0,99990 | 0,05835 | 0,10142 | 0,53928 | 1 | 1 | 0,37222 |
| flow of vehicles | 0,36808 | 0,00206 | 0,23817 | 0,38990 | 0,37222 | 0,37222 | 1 |

Table S.10: Spearman correlation for all analysed centrality measures in STAR. EC: Eigenvector centrality, BC: Betweenness centrality, PR: Pagerank centrality, k: degree, AC: Authority centrality, HC: Hub centrality.

|  | EC | BC | PR | k | HC | AC | flow of vehicles |
| --- | --- | --- | --- | --- | --- | --- | --- |
| EC | 1 | 0,33173 | 0,06838 | 0,41174 | 0,99999 | 0,99999 | 0,16595 |
| BC | 0,33173 | 1 | 0,59925 | 0,66085 | 0,33175 | 0,33175 | 0,08963 |
| PR | 0,06838 | 0,59925 | 1 | 0,85321 | 0,06838 | 0,06838 | 0,05978 |
| k | 0,41174 | 0,66085 | 0,85321 | 1 | 0,41175 | 0,41175 | 0,11445 |
| HC | 0,99999 | 0,33175 | 0,06838 | 0,41175 | 1 | 1 | 0,16583 |
| AC | 0,99999 | 0,33175 | 0,06838 | 0,41175 | 1 | 1 | 0,16583 |
| flow of vehicles | 0,16595 | 0,08963 | 0,05977 | 0,11445 | 0,16583 | 0,16583 | 1 |

Table S.11: Spearman correlation for all analysed centrality measures in Thunder Bay Transit. EC: Eigenvector centrality, BC: Betweenness centrality, PR: Pagerank centrality, k: degree, AC: Authority centrality, HC: Hub centrality.

|  | EC | BC | PR | k | HC | AC | flow of vehicles |
| --- | --- | --- | --- | --- | --- | --- | --- |
| EC | 1 | 0,08151 | -0,29744 | 0,14430 | 0,99725 | 0,99725 | 0,06945 |
| BC | 0,08151 | 1 | 0,01889 | 0,3457 | 0,07230 | 0,07230 | 0,13203 |
| PC | -0,29744 | 0,01889 | 1 | 0,57584 | -0,29181 | -0,29181 | 0,04327 |
| k | 0,14430 | 0,34567 | 0,57584 | 1 | 0,14380 | 0,14380 | 0,00912 |
| HC | 0,99725 | 0,07230 | -0,29181 | 0,14380 | 1 | 1 | 0,07310 |
| AC | 0,99725 | 0,07230 | -0,29181 | 0,14380 | 1 | 1 | 0,07310 |
| flow of vehicles | 0,06945 | 0,13203 | 0,04327 | 0,0091 | 0,07310 | 0,07310 | 1 |

Table S.12: Spearman correlation for all analysed centrality measures in TransAntofagasta. EC: Eigenvector centrality, BC: Betweenness centrality, PR: Pagerank centrality, k: degree, AC: Authority centrality, HC: Hub centrality.

|  | EC | BC | PR | k | HC | AC | flow of vehicles |
| --- | --- | --- | --- | --- | --- | --- | --- |
| eigen | 1 | -0,01792 | 0,00846 | 0,24387 | 0,99868 | 0,99868 | -0,03914 |
| bet | -0,01792 | 1 | 0,50547 | 0,46660 | -0,02535 | -0,02535 | 0,09793 |
| pag | 0,00846 | 0,50547 | 1 | 0,91172 | -0,00425 | -0,00425 | 0,10882 |
| deg | 0,24387 | 0,46660 | 0,91172 | 1 | 0,23418 | 0,23418 | 0,09294 |
| hub | 0,998676368517463 | -0,02535 | -0,00425 | 0,23418 | 1 | 1 | -0,04383 |
| auth | 0,998676368517463 | -0,02535 | -0,00425 | 0,23418 | 1 | 1 | -0,04383 |
| flow of vehicles | -0,03914 | 0,09793 | 0,10881 | 0,09294 | -0,04383 | -0,04383 | 1 |
